# Supplementary material for: Modification of Polydiallyldimethylammonium Chloride with Sodium Polystyrenesulfonate Dramatically Changes the Resistance of Polymer-Based Coatings towards Wash-Off from Both Hydrophilic and Hydrophobic Surfaces
Source: MDPI journal article supplement (doi:10.3390/polym14061247), 2022-03-19
Supplement: s1 [file s1]

# Supplementary Information

For

## Modification of polydiallyldimethylammonium chloride with sodium polystyrenesulfonate dramatically change the resistance of polymer-based coatings towards wash-off from both hydrophilic and hydrophobic surfaces

Vladislava A. Pigareva<sup>1</sup>, Ivan N. Senchikhin<sup>2</sup>, Anastasia V. Bolshakova<sup>1,2</sup> and Andrey V. Sybachin<sup>1,\*</sup>

<sup>1</sup> Lomonosov Moscow State University, Chemistry Department, Moscow, 119991, Russia

<sup>2</sup> Frumkin Institute of Physical Chemistry and Electrochemistry, Russian Academy of Sciences, Moscow, 119071, Russia

\* Correspondence: sybatchin@mail.ru; Tel.: +74959393114

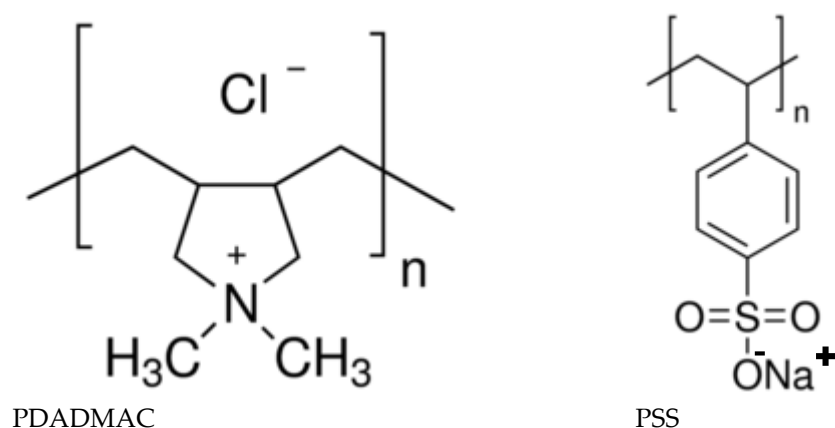

**Figure S1.** Structure formulas of polyelectrolytes.

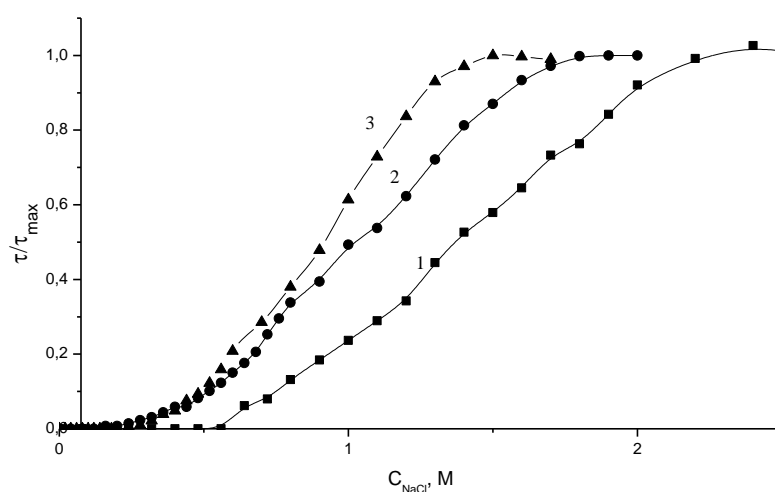

**Figure S2.** Turbidimetric titration curves for the PDADMAC/PSS IPEC mixture with NaCl.  $C_{PDADMAC} = 4 \times 10^{-4}$  base-mol/l,  $\chi = 0.03$  (1); 0.09 (2) and 0.12 (3); pH 7.0.

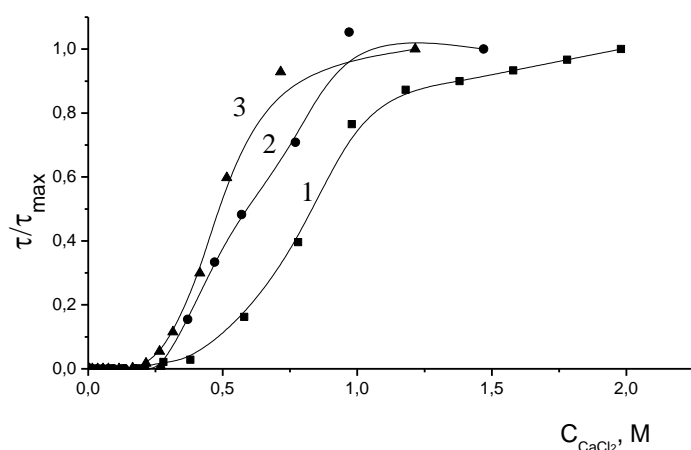

**Figure S3.** Turbidimetric titration curves for the PDADMAC/PSS IPEC mixture with  $\text{CaCl}_2$ .  $C_{\text{PDADMAC}} = 4 \times 10^{-4}$  base-mol/l,  $\chi = 0.06$  (1); 0.09 (2) and 0.12 (3); pH 7.0.

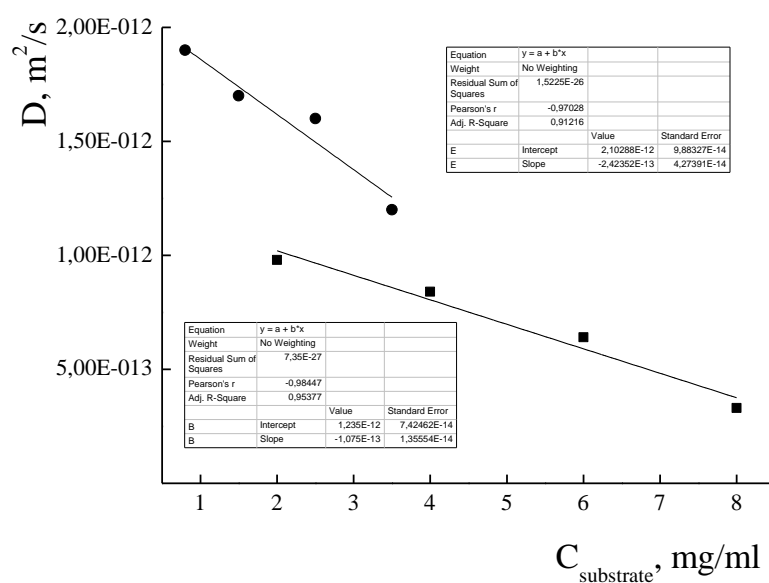

**Figure S4.** Dependence of the diffusion coefficient upon the concentration of a solution of PDADMAC (1) and IPEC (2) in a water-salt media. pH 7;  $C_{\text{NaCl}} = 0.05$  M.

Analysis of the average thickness of the IPEC layers on the glass and PVC surfaces was made using Gwyddion software.

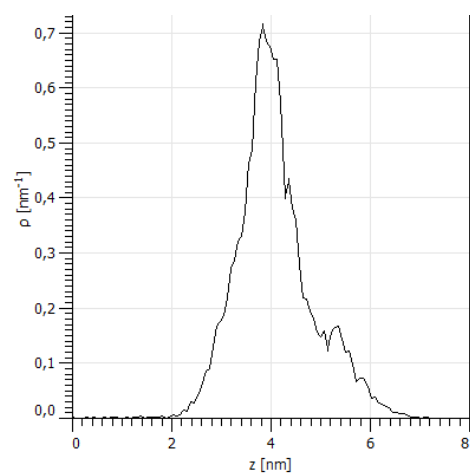

a

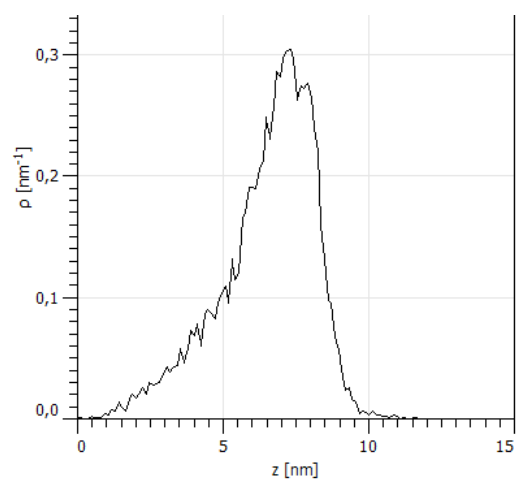

b

**Figure S5.** Size distribution densities on the AFM images of the IPEC layers on the glass (a) and PVC (b) substrates
